# Supplementary material
Source: MDPI journal article supplement (https://www.mdpi.com/2311-5629/1/1/43)
Supplement: s1 [file s1]

Supplemental Materials

1H NMR Spectra of the Model Substances

Phenol


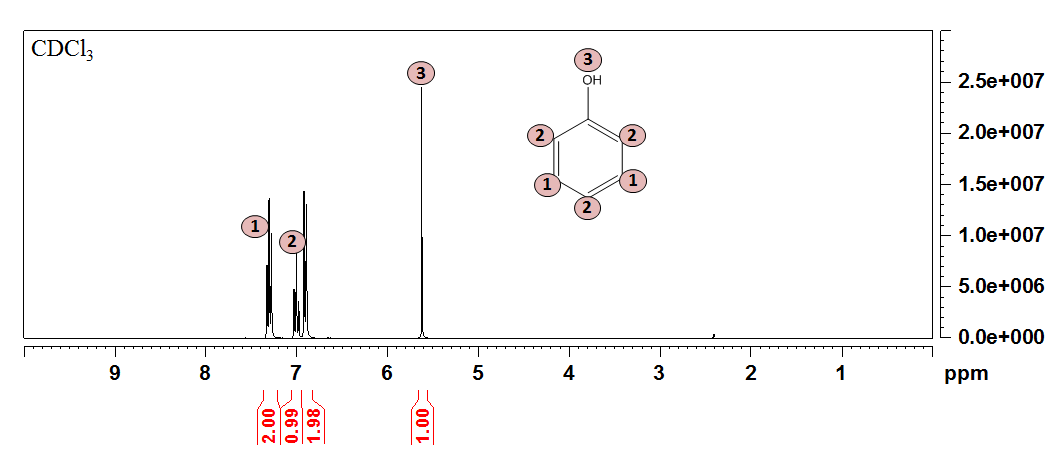


Methoxybenzene


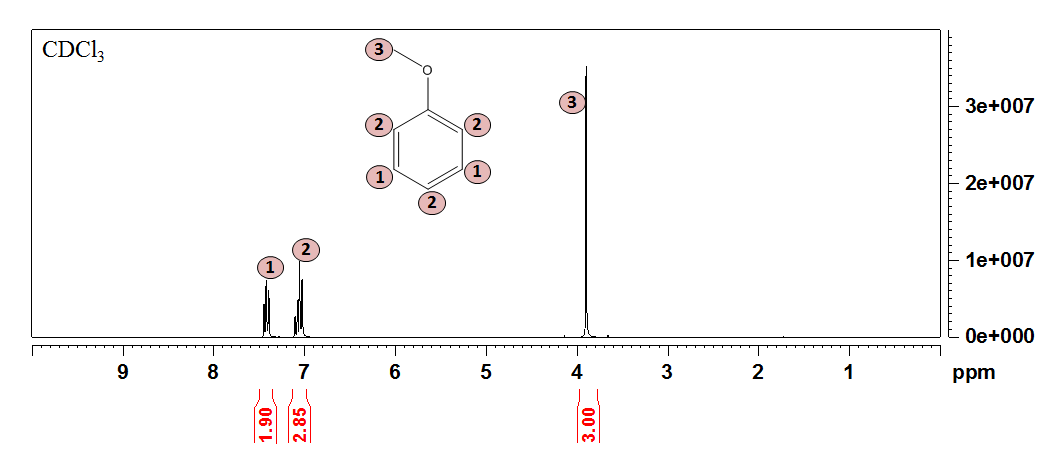


Phenylmethanol


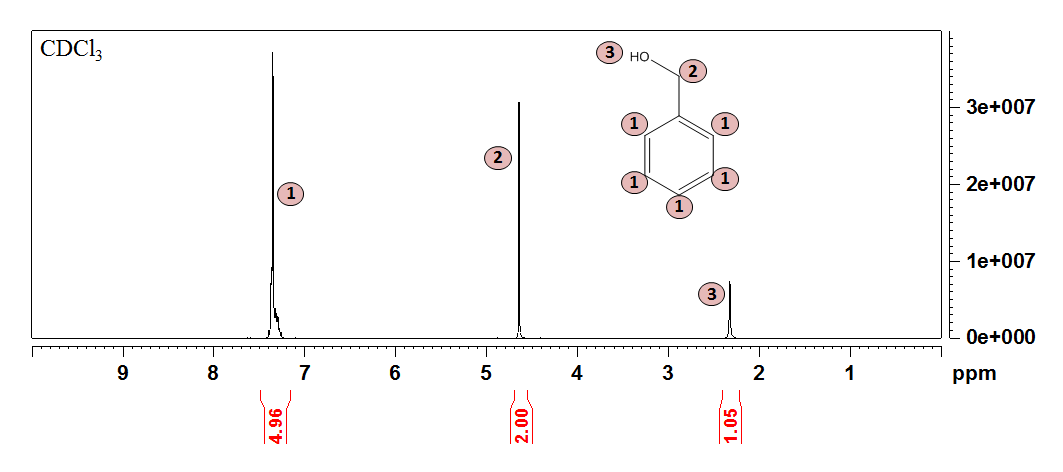


Vanillyl Alcohol


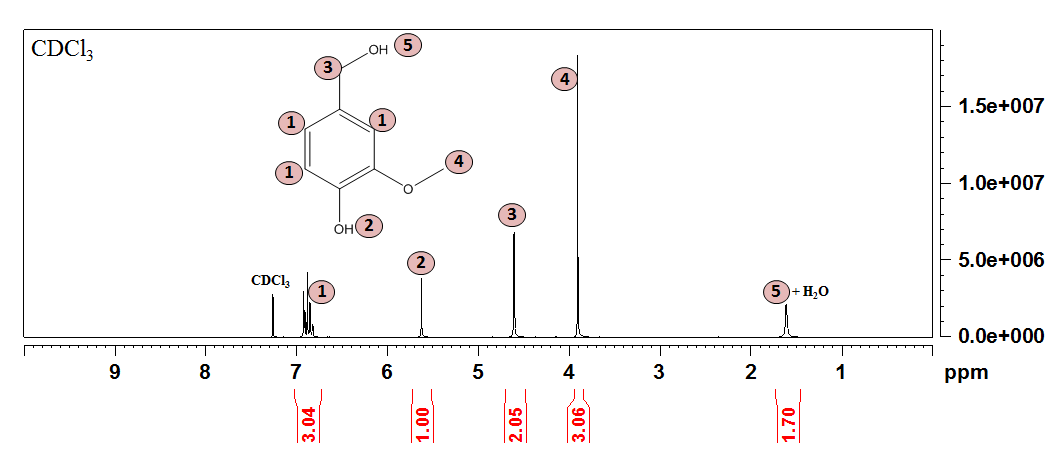


Toluene-2,4-Diisocyanate


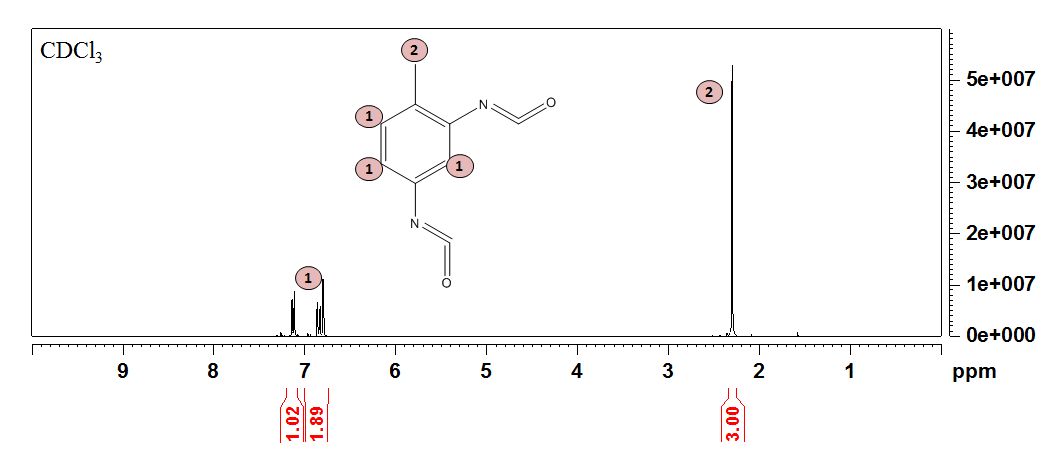


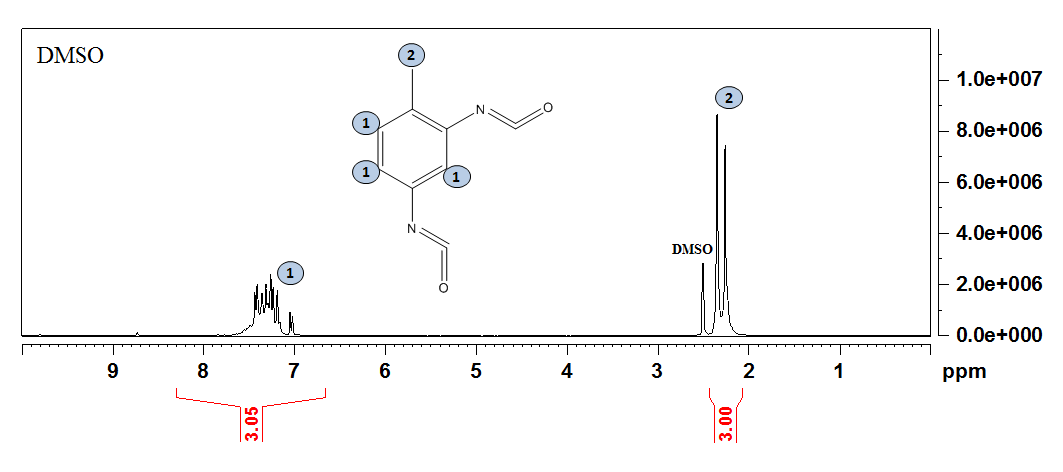


Methanesulfonic Acid


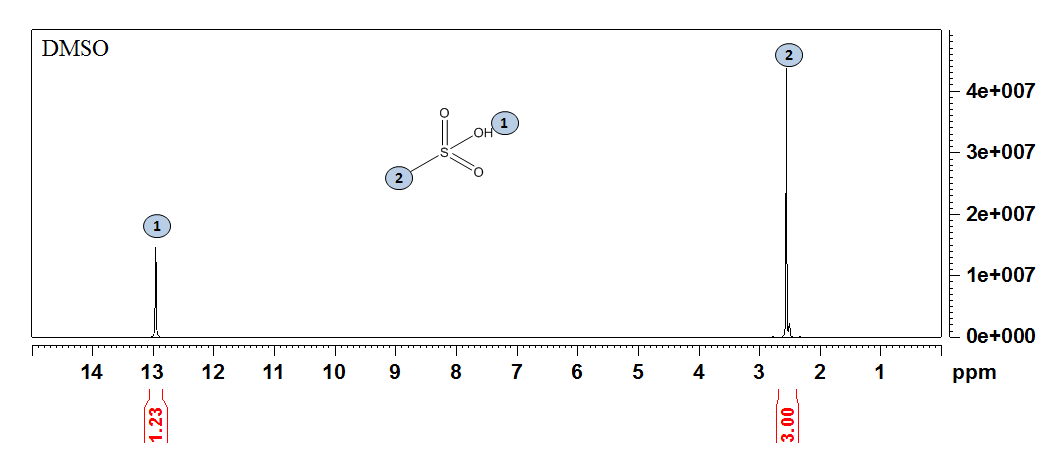


Sodium Methanesulfonate


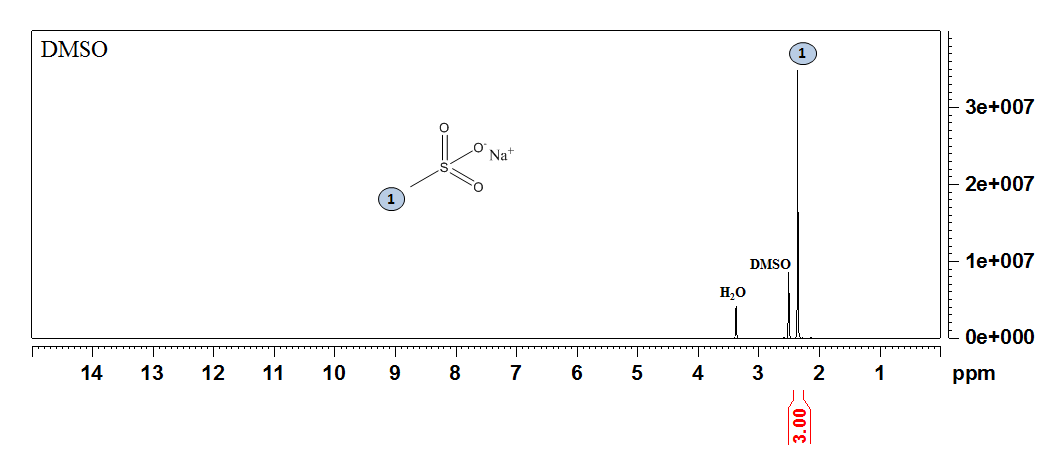


Reaction Sequences of the Model Substances with TDI

Phenol and TDI—Test for the Reactivity of Phenolic OH Groups


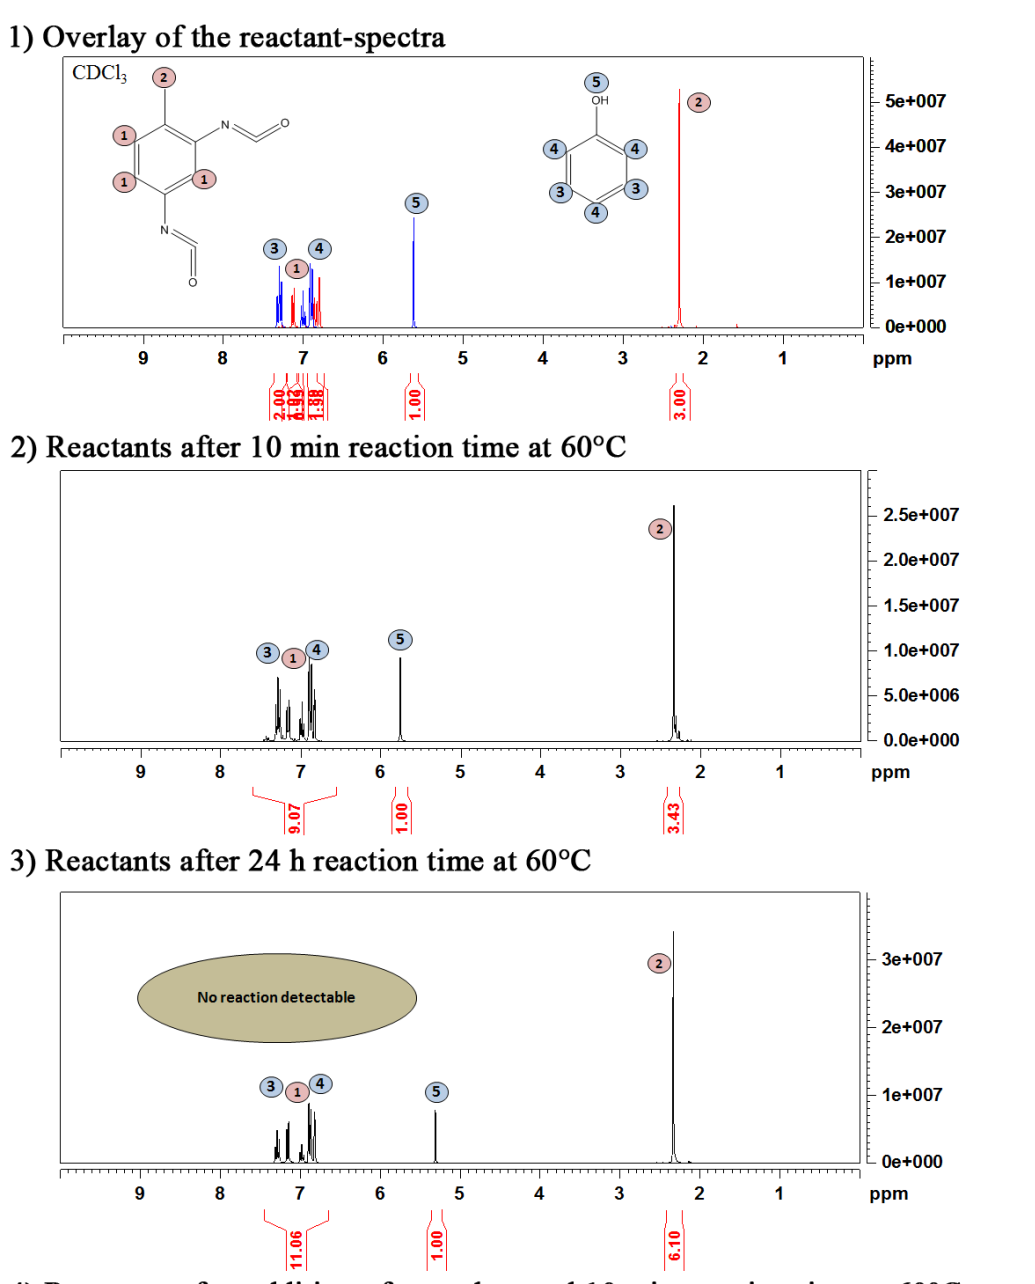


Conclusion: Phenolic OH groups do not react with TDI without a catalyst at 60 °C within 24 h
reaction time.

Methoxybenzene and TDI—Test for the Reactivity of Methoxy Groups


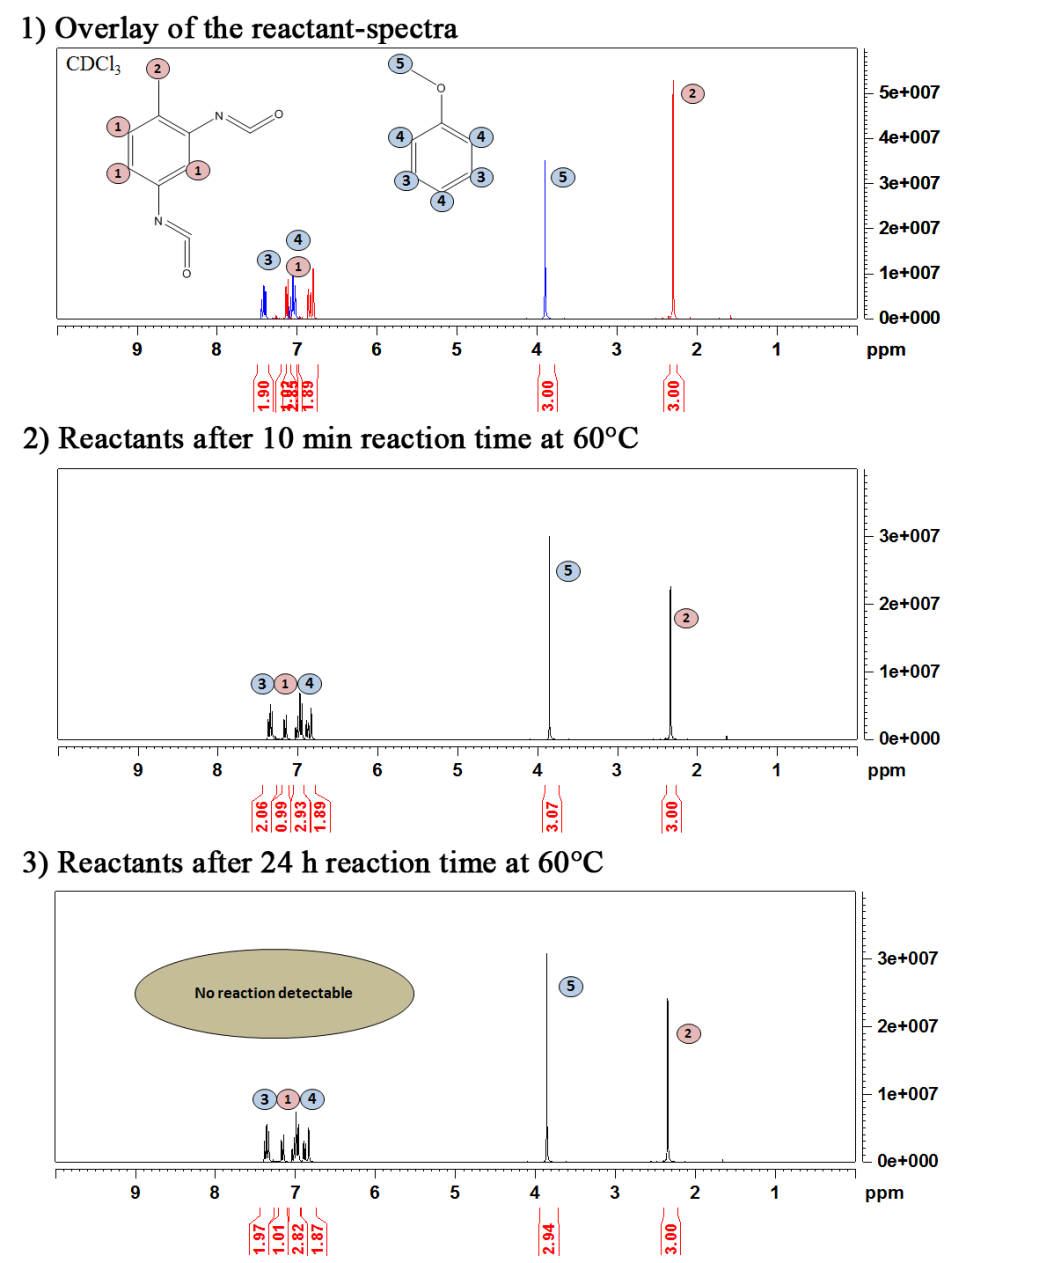


Conclusion: Methoxy groups do not react with TDI.

Phenylmethanol and TDI—Test for the Reactivity of Aliphatic OH Groups


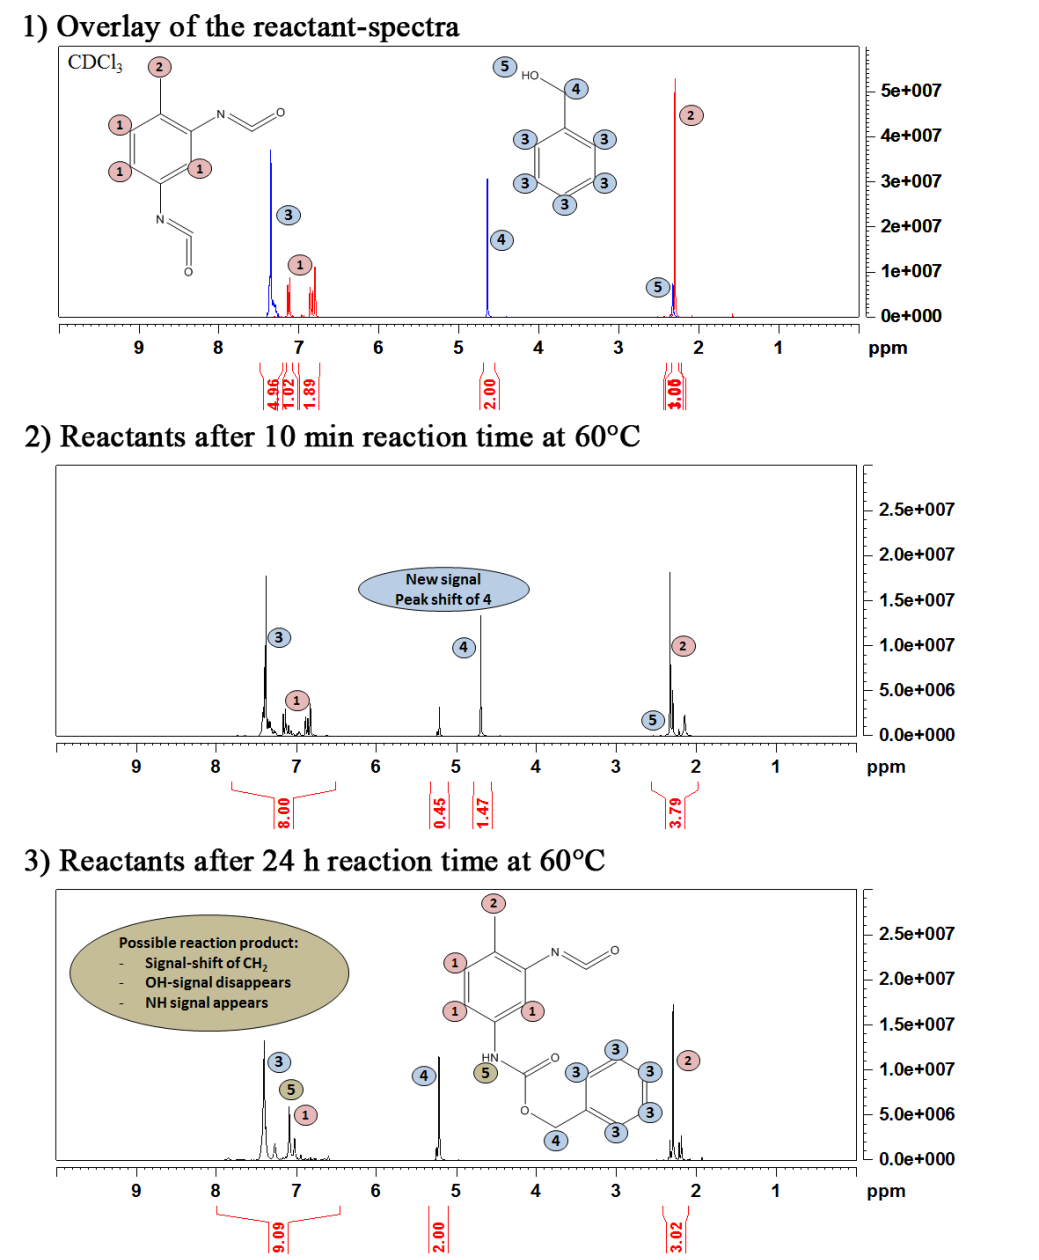


Conclusion: Aliphatic OH groups react with TDI.

Vanillyl Alcohol—Test for the Reactivity of Aliphatic OH Groups beside Phenolic OH Groups and Methoxy Groups in the G-Lignin


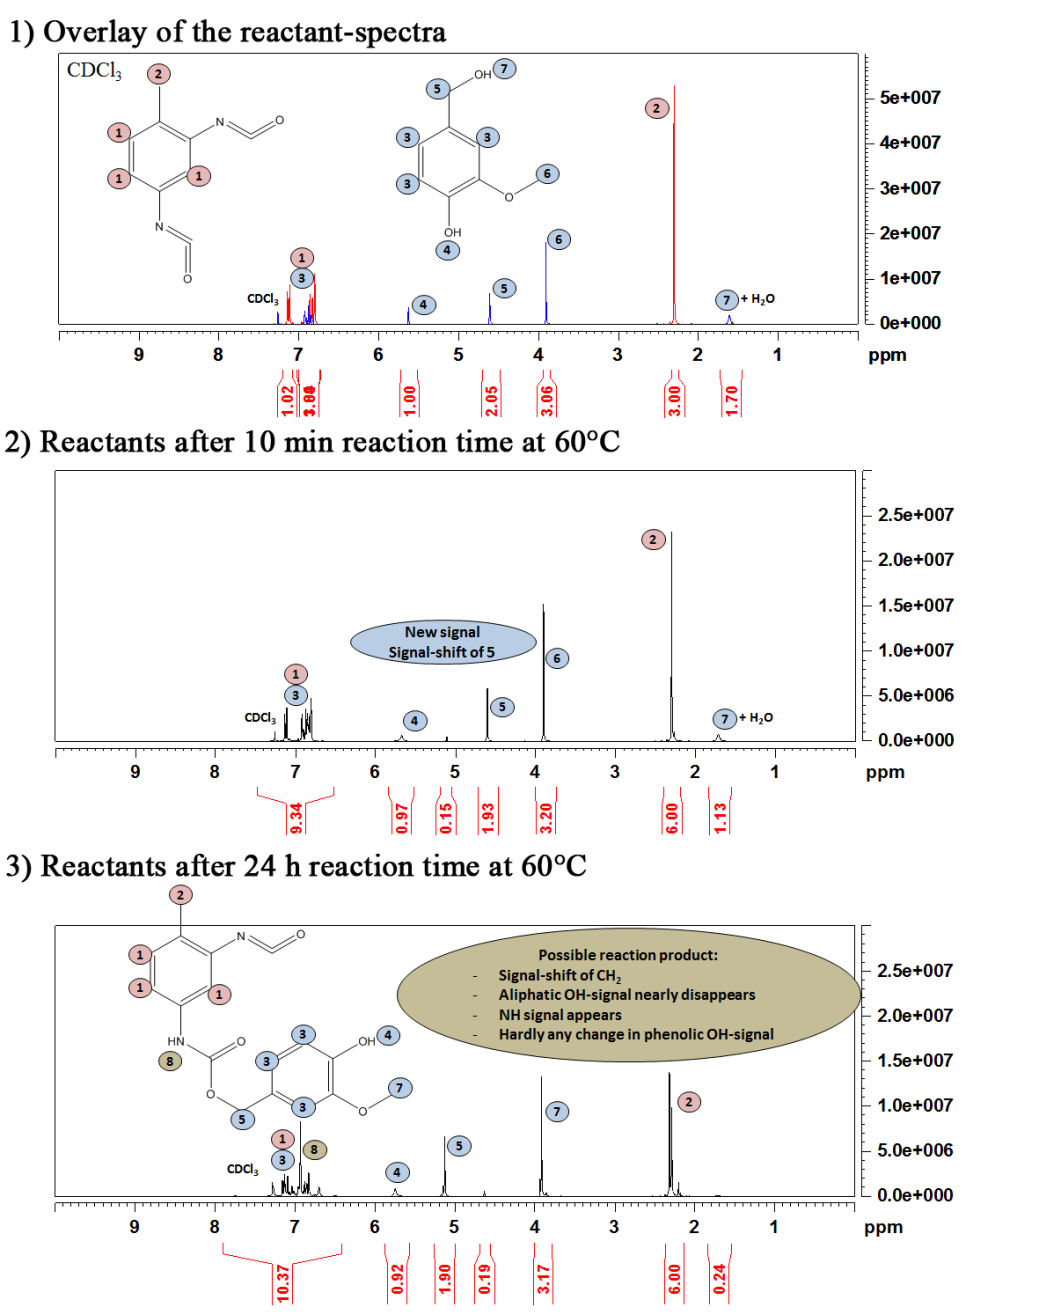


Conclusion: Aliphatic OH groups react with TDI, phenolic OH groups are not very reactive and methoxy groups do not react with TDI.

Syringyl Alcohol—Test for the Reactivity of Aliphatic OH Groups beside Phenolic OH Groups and Methoxy Groups in the S-Lignin


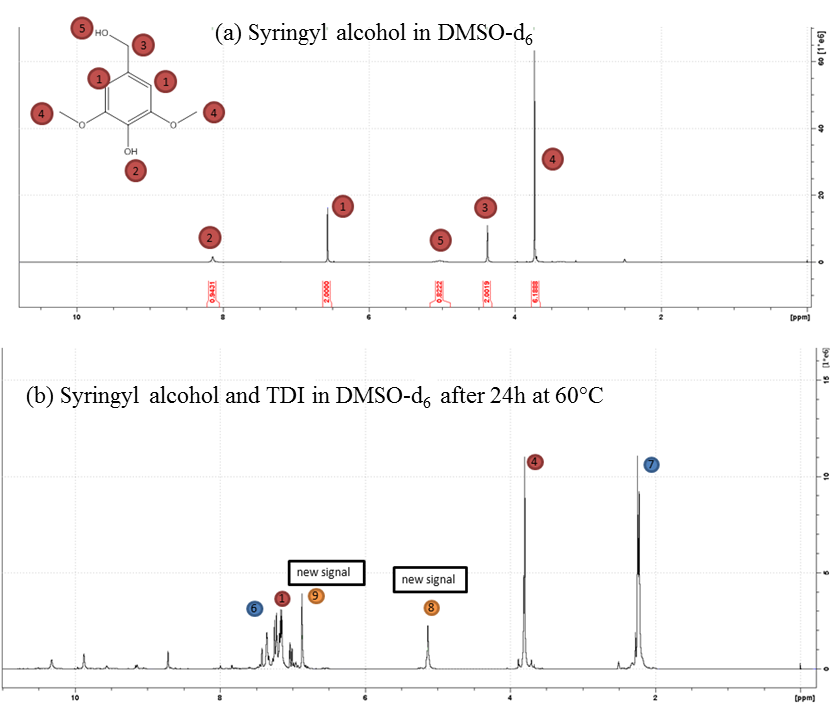


Conclusion: Aliphatic OH groups react with TDI, phenolic OH groups are not very reactive and methoxy groups do not react with TDI. Signals 6 can be attributed to the aromatic hydrogens from TDI and 7 to the CH3group.

Sodium Methanesulfonate—Test for the Reactivity of the Sulfonate Group


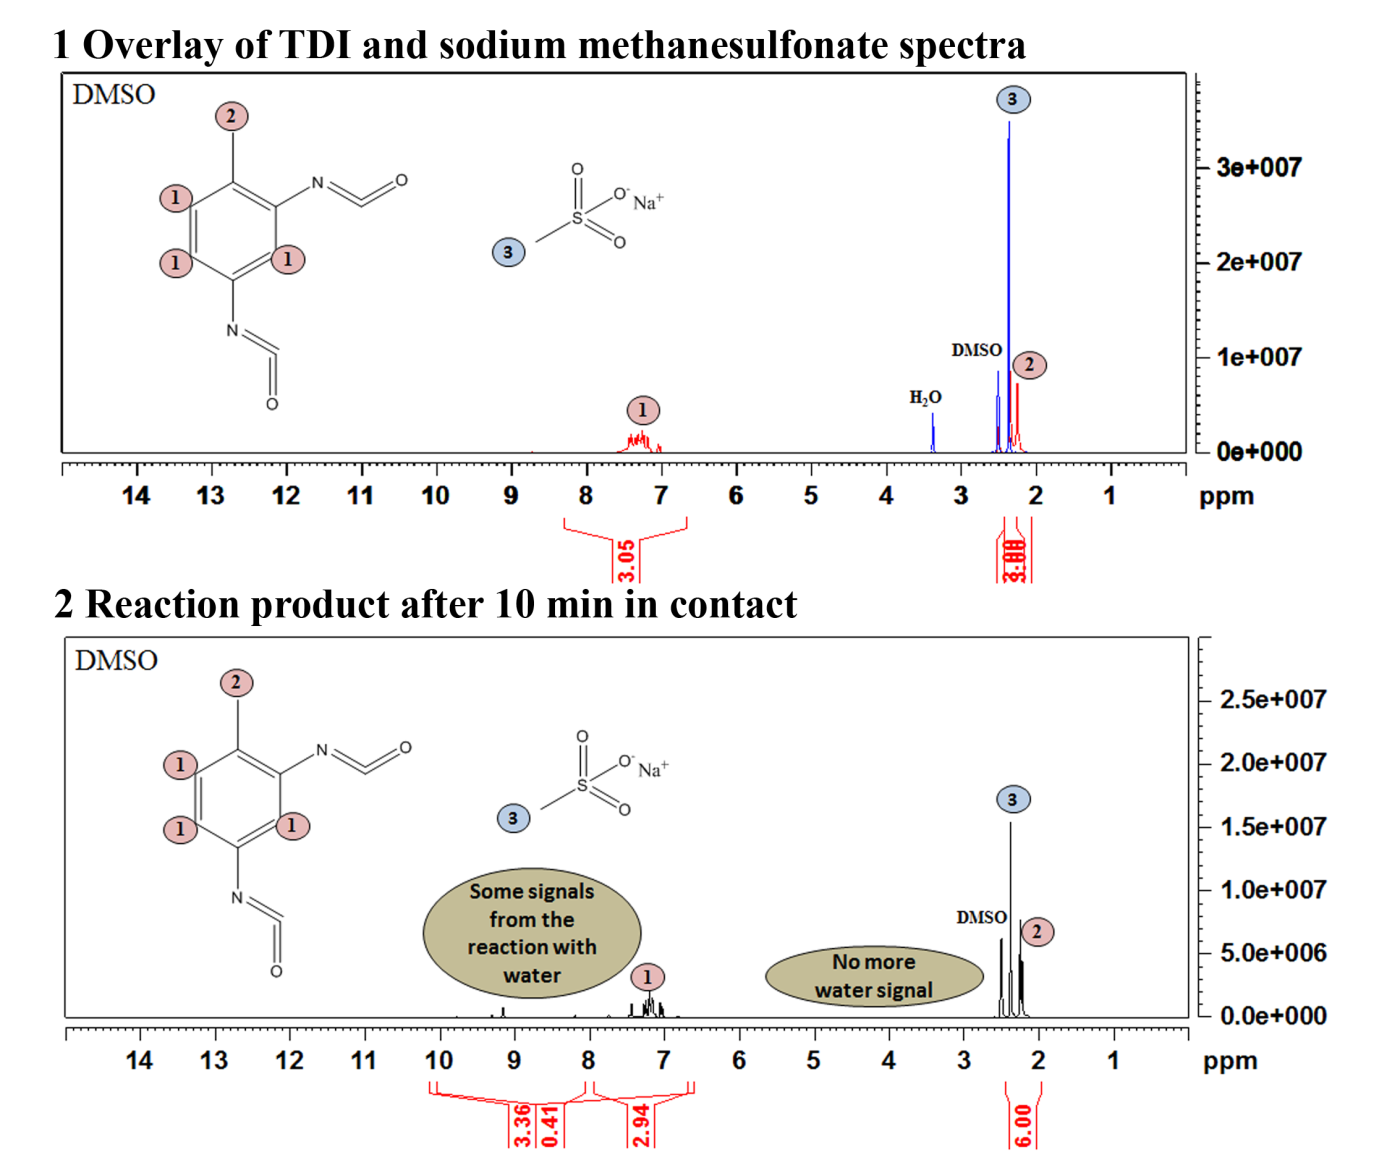


Conclusion: The sulfonate does not react with TDI (in contrast to the acid-form), but the sulfonate group catalyses (nucleophile) the reaction of water with TDI.
